# Supplementary material for: Investigating the activity of Ca2Fe2O5 additives on the thermochemical energy storage performance of limestone waste
Source: Royal Society of Chemistry journal article supplement (doi:10.1039/d3ra05875a), 2023-01-01
Supplement: d3ra05875a1.pdf [file d3ra05875a1.pdf]

**Electronic Supplemental Information for:**  
**Exploring the Influence of Ca<sub>2</sub>Fe<sub>2</sub>O<sub>5</sub> Additives on**  
**Thermochemical Energy Storage Capacity of Waste**  
**Limestone**

Rehan Anwar<sup>a</sup>, Rajani K. Vijayaraghavan<sup>b</sup>, Patrick J. McNally<sup>b</sup>, Maria Myrto Dardavila<sup>a,c</sup>,  
Epaminondas Voutsas<sup>c</sup>, M. Veronica Sofianos<sup>a\*</sup>

<sup>a</sup>School of Chemical and Bioprocess Engineering, University College Dublin, Belfield, Dublin  
4, Ireland

<sup>b</sup>School of Electronic Engineering, Dublin City University, Glasnevin, Dublin 9, Ireland

<sup>c</sup>School of Chemical Engineering, National Technical University of Athens, 9 Iroon  
Polytechniou Str., 15780 Athens, Greece

E-mail: [mvsolianou@gmail.com](mailto:mvsolianou@gmail.com)

Table 1S Description of additive studies for CaCO<sub>3</sub> based TCHS

| Additive                       | Wt % additive | Operating Temperature (°C) | Formed Product                                                                                       | Reference |
|--------------------------------|---------------|----------------------------|------------------------------------------------------------------------------------------------------|-----------|
| CaCO <sub>3</sub><br>Pure      | N/A           | 750-925                    | N/A                                                                                                  | 1         |
| Al <sub>2</sub> O <sub>3</sub> | 2.5           | 850-900                    | Ca <sub>12</sub> Al <sub>14</sub> O <sub>33</sub>                                                    | 2         |
| Al <sub>2</sub> O <sub>3</sub> | 16.7          | 850-950                    | Ca <sub>5</sub> Al <sub>6</sub> O <sub>14</sub><br>Ca <sub>12</sub> Al <sub>14</sub> O <sub>33</sub> | 3         |
| Al <sub>2</sub> O <sub>3</sub> | 34            | 850-950                    | Ca <sub>3</sub> Al <sub>2</sub> O <sub>6</sub>                                                       | 4         |
| Al <sub>2</sub> O <sub>3</sub> | 13.3          | 900                        | Ca <sub>5</sub> Al <sub>6</sub> O <sub>14</sub>                                                      | 5         |
| Al <sub>2</sub> O <sub>3</sub> | 5             | 725-850                    | Ca <sub>4</sub> Al <sub>6</sub> O <sub>13</sub>                                                      | 6         |
| ZrO <sub>2</sub>               | 34            | 950                        | CaZrO <sub>3</sub>                                                                                   | 3         |
| ZrO <sub>2</sub>               | 20            | 900                        | CaZrO <sub>3</sub>                                                                                   | 5         |
| ZrO <sub>2</sub>               | 5             | 850-750                    | CaZrO <sub>3</sub>                                                                                   | 7         |
| ZrO <sub>2</sub>               | 15            | 850-750                    | CaZrO <sub>3</sub>                                                                                   | 7         |
| ZrO <sub>2</sub>               | 30            | 850-750                    | CaZrO <sub>3</sub>                                                                                   | 7         |
| ZrO <sub>2</sub>               | 20            | 900                        | CaZrO <sub>3</sub>                                                                                   | 8         |
| SiO <sub>2</sub>               | 5             | 700                        | -                                                                                                    | 9         |
| SiO <sub>2</sub>               | 20            | 900                        | Ca <sub>5</sub> (SiO <sub>4</sub> ) <sub>2</sub> C<br>O <sub>3</sub>                                 | 8         |
| SiC                            | 20            | 884                        | -                                                                                                    | 10        |
| Fe <sub>2</sub> O <sub>3</sub> | 20            | 900                        | Fe <sub>3</sub> O <sub>4</sub> ,<br>Ca <sub>2</sub> Fe <sub>2</sub> O <sub>5</sub>                   | 8         |

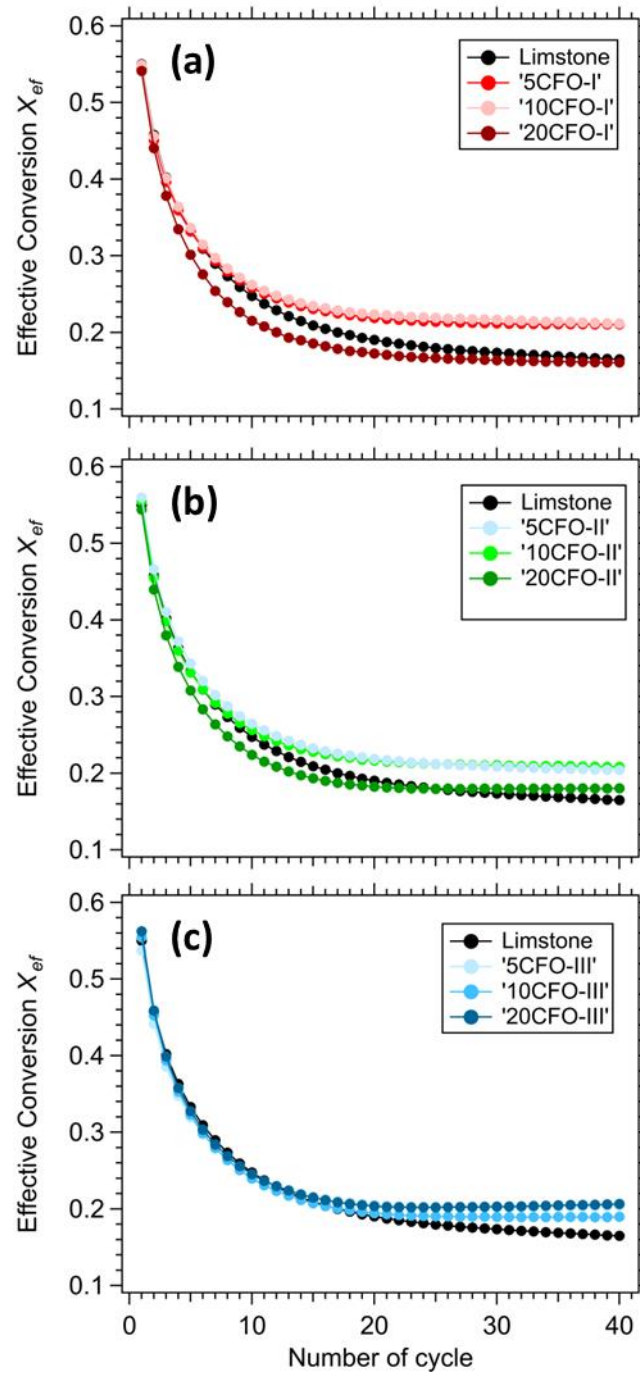

Fig. S1 Effective conversion vs number of cycles for 5,10 and 20% additive (a) CFO-I (b) CFO-II (c) CFO-III

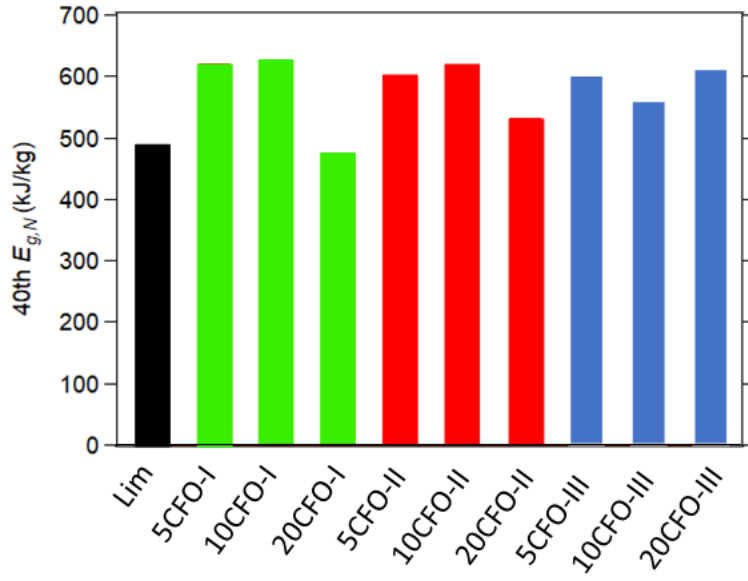

Fig. S2 Energy storage density of all samples for the 40<sup>th</sup> cycle

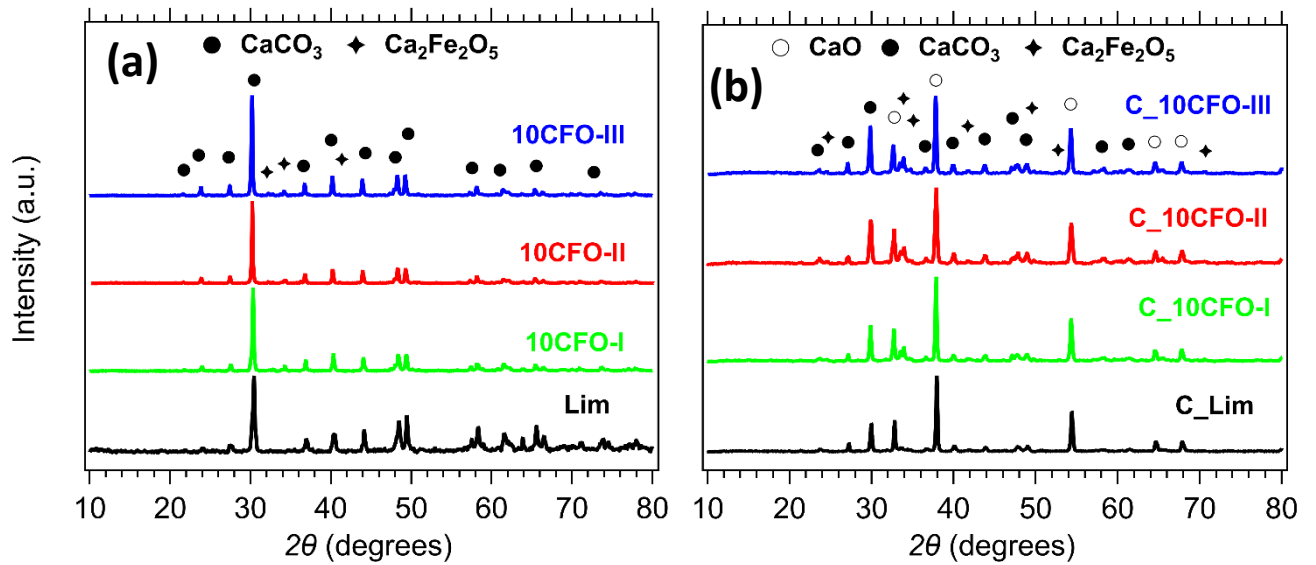

Fig. S3 XRD patterns of Lim and 5CFO samples before (a) and after cycling (b)

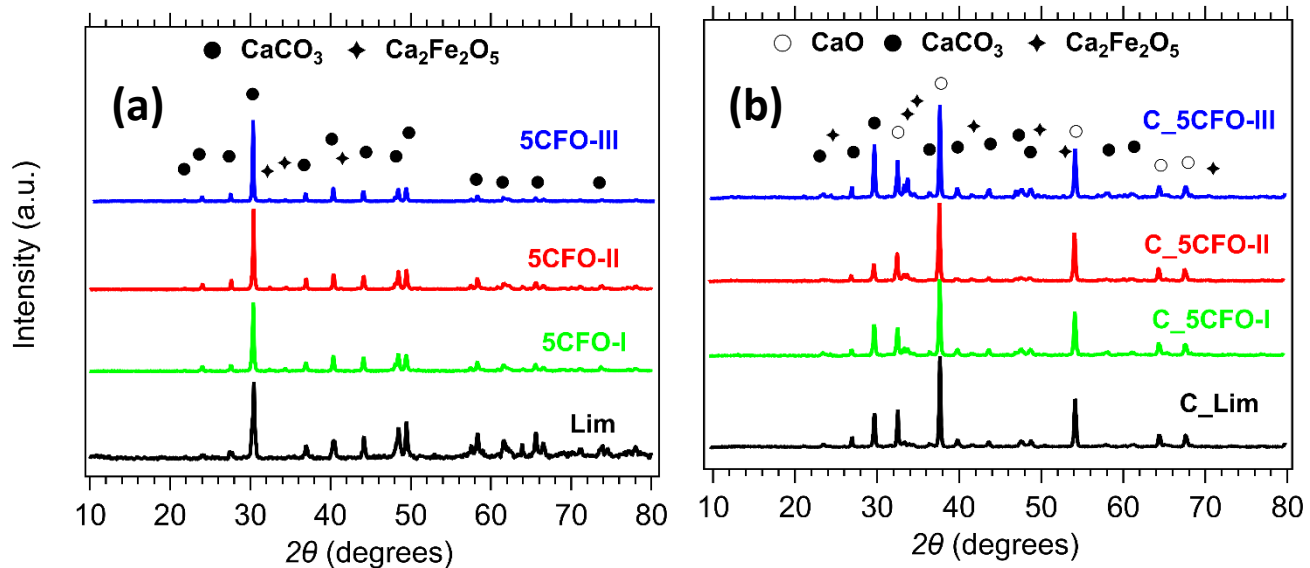

Fig. S4 XRD patterns of Lim and 10FO before (a) and after cycling (b)

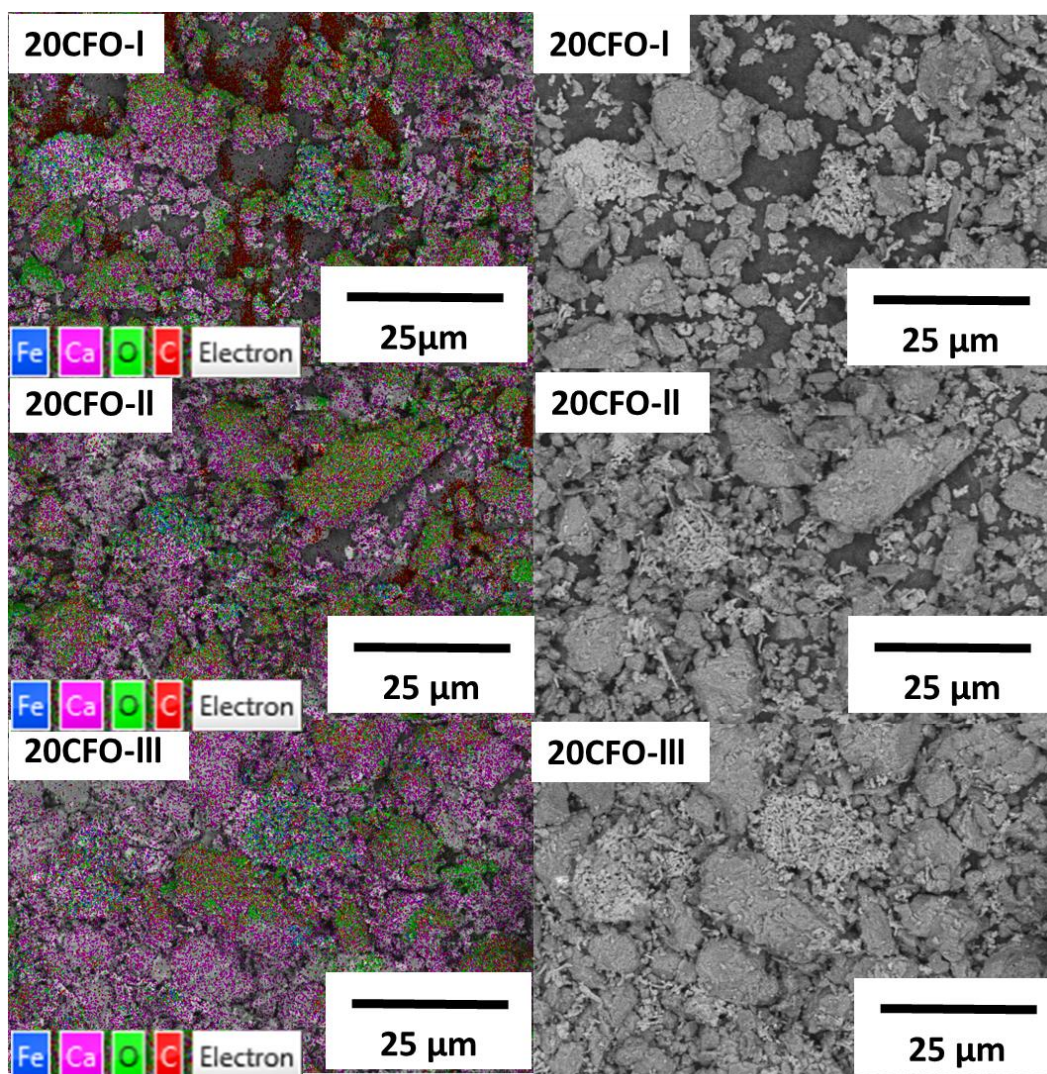

Fig. S5 EDS mapping of 20CFO-I, 20CFO-II and 20CFO-III samples as prepared

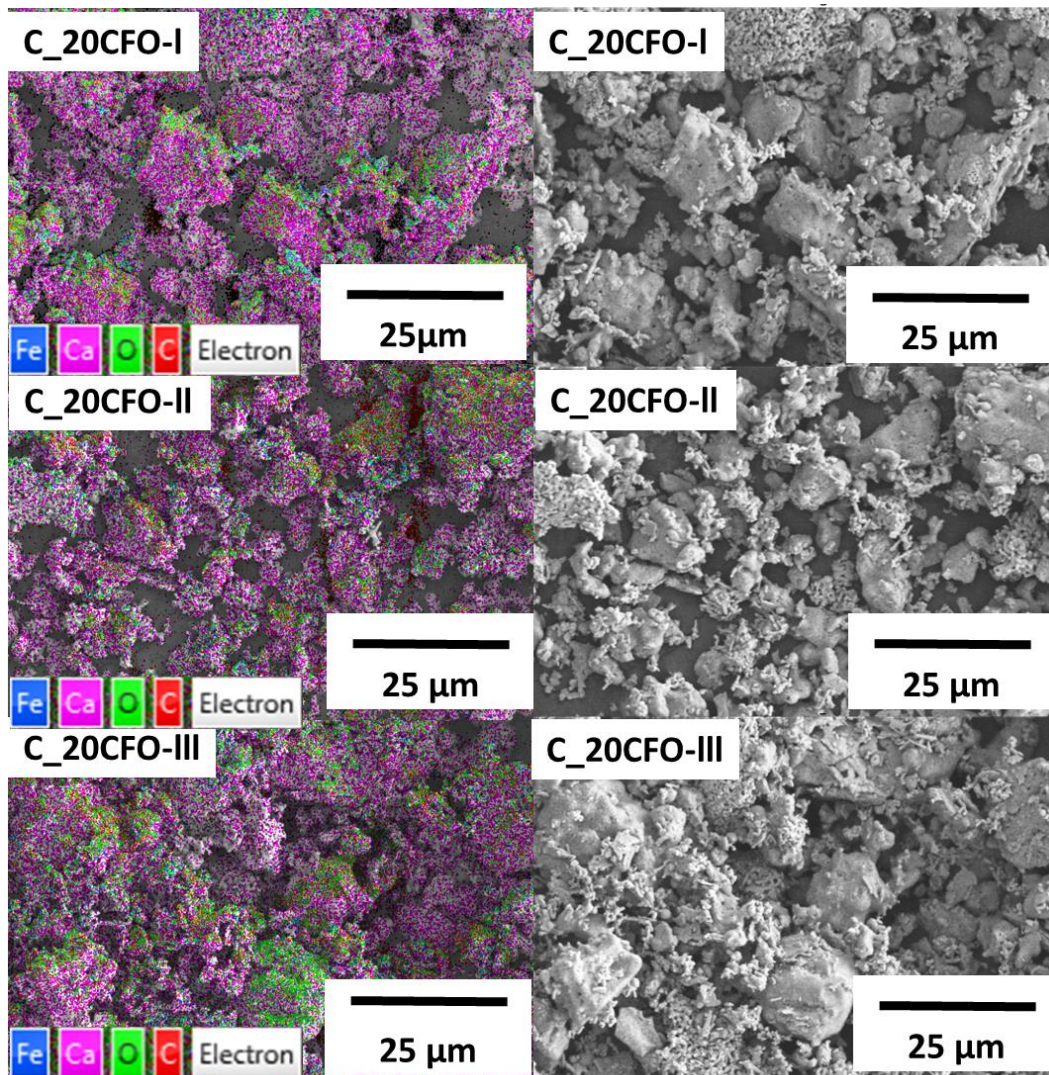

Fig. S6 EDS mapping of 20CFO-I, 20CFO-II and 20CFO-III samples after cycling

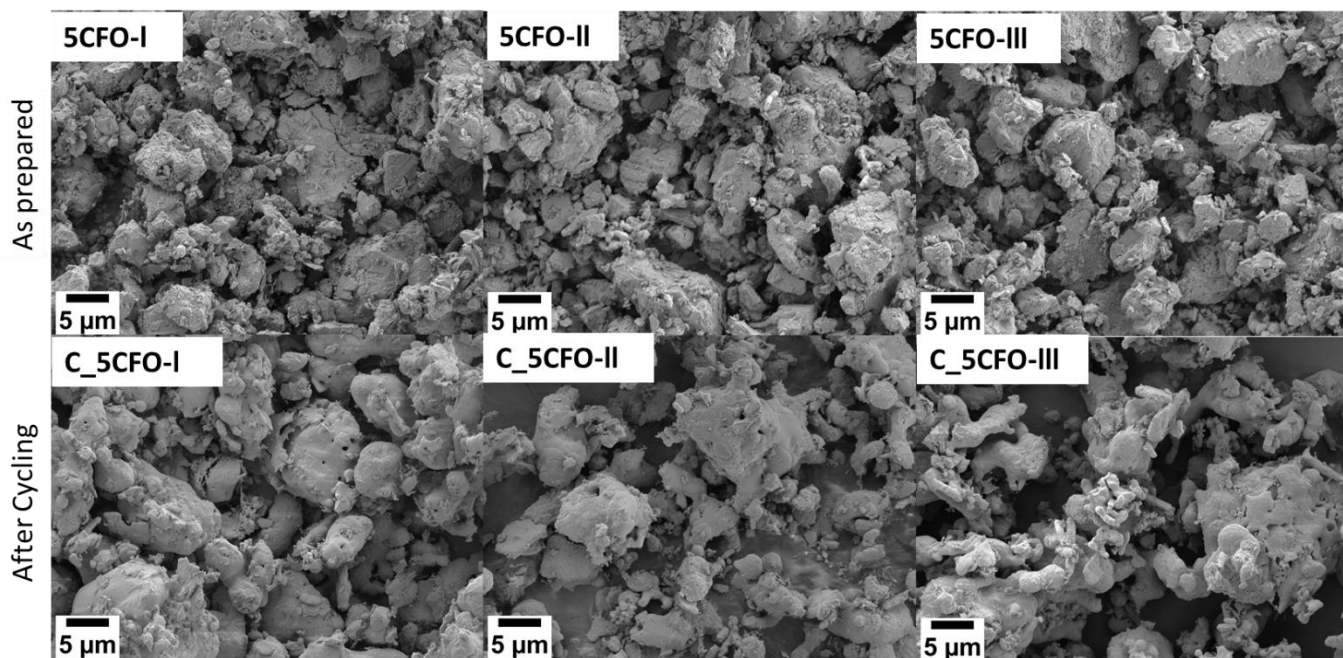

Fig. S7 SEM images of Lim and 5CFO as prepared and after cycling samples; 5CFO-I, 5CFO-II, and 5CFO-III; C\_5CFO-I, C\_5CFO-II, and C\_5CFO-III

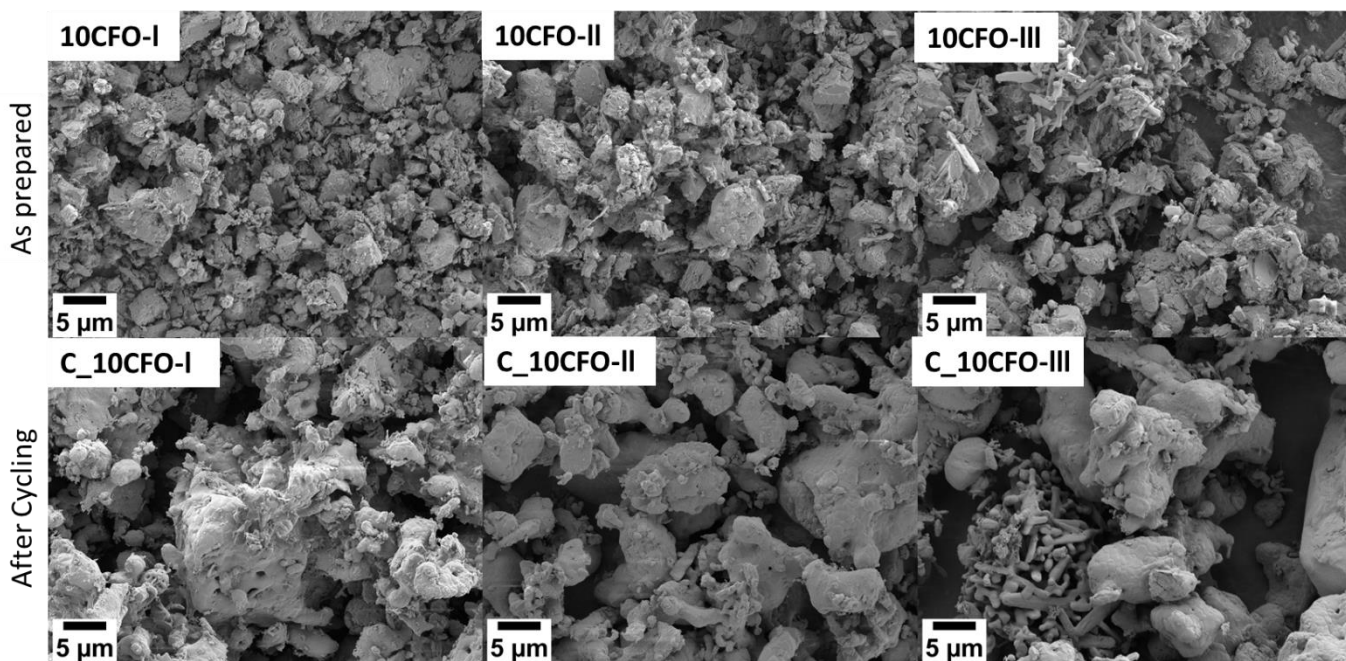

Fig. S8 SEM images of Lim and 10CFO as prepared and after cycling samples; 10CFO-I, 10CFO-II, and 10CFO-III; C\_10CFO-I, C\_10CFO-II, and C\_10CFO-III

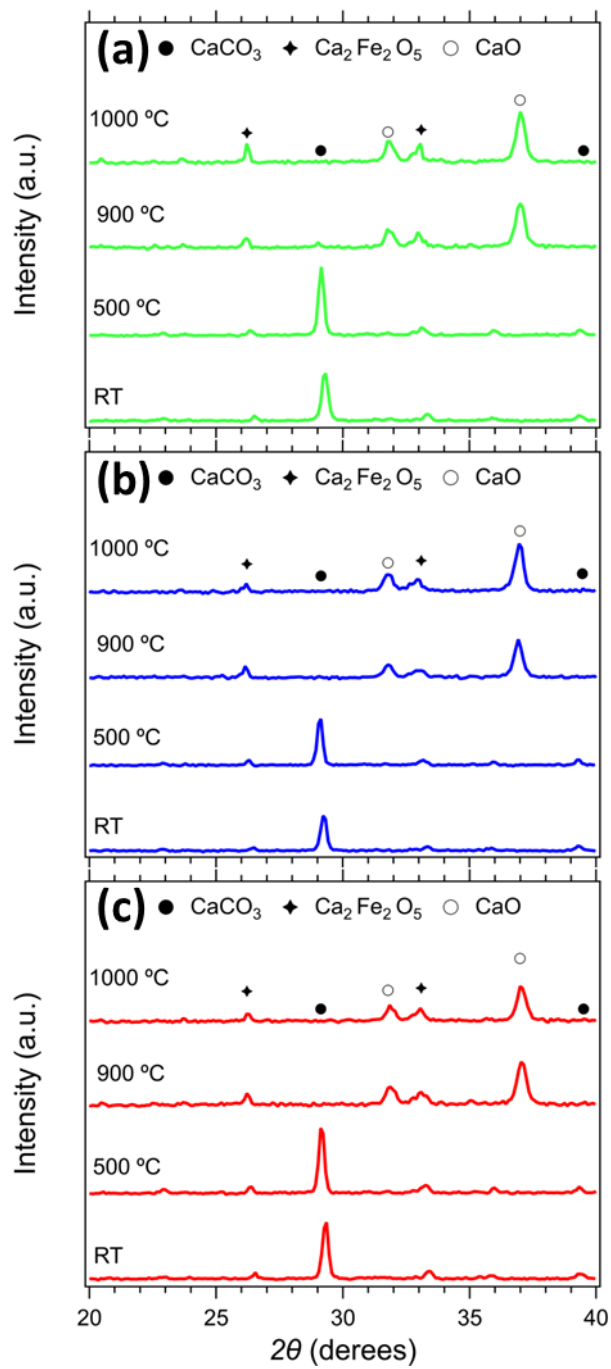

Fig. S9 In situ XRD patterns of 20CFO samples a) 20CFO-I b) 20CFO-II and c) 20CFO-III



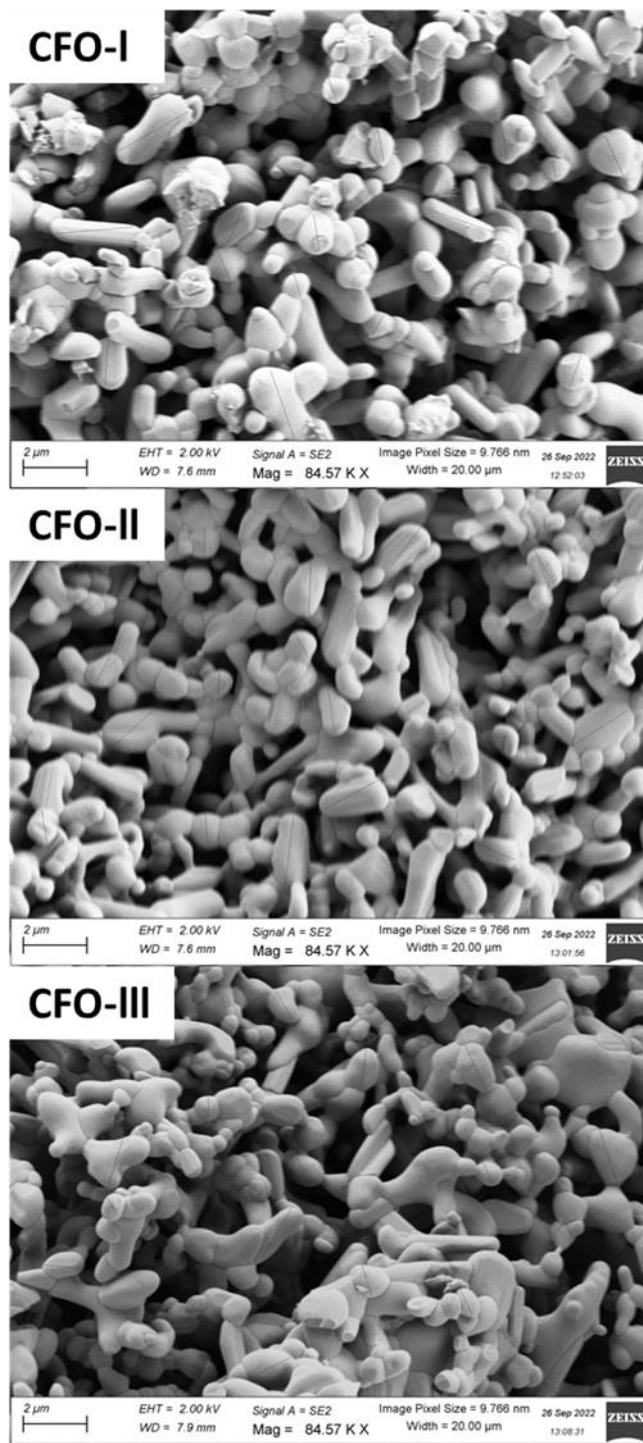

Fig. S10 SEM images of CFO-I, CFO-II and CFO-III showing lines on the particles, considered for calculation of average particle size

The standard enthalpy of reaction at a temperature T (in K) is calculated from the following equations:

$$\Delta H_{R,T}^{\circ} = \Delta H_{R,298.15}^{\circ} + \int_{298.15}^T \Delta c_p(T) \cdot dT \quad (1)$$

$$\Delta H_{R,298.15}^{\circ} = \sum_{products} \Delta H_{f,298.15}^{\circ} - \sum_{reactants} \Delta H_{f,298.15}^{\circ} \quad (2)$$

$$\Delta c_p(T) = \sum_{products} c_p(T) - \sum_{reactants} c_p(T) \quad (3)$$

Standard enthalpy of formation at 298.15 K values,  $\Delta H_{f,298.15}^{\circ}$ , were taken from NIST data base for CO<sub>2</sub> and CaO and for CaCO<sub>3</sub> from (Wagman, D. D.; Evans, W. H.; Parker, V. B.; Schumm, R. H.; Halow, I.; Bailey, S. M.; Churney, K. L.; Nuttall, R. L. The NBS Tables of Chemical Thermodynamic Properties: Selected Values for Inorganic and C1 and C2 Organic Substances in SI Units, J. Phys. Chem. Ref. Data, 1982, 11, Supplement 2)

From Eq. 2  $\Delta H_{R,298.15}^{\circ} = -634.92 - 393.51 + 1206.92 = +178.5 \text{ kJ/mol}$

The equation used by your student,  $\Delta H(850^{\circ}\text{C}) = \Delta H^{\circ} + C_p(T_2 - T_1)$ , is wrong because your student used only the  $c_p$  of CaCO<sub>3</sub> and not the  $\Delta c_p$  as in Eq. 3. I also used temperature dependent  $c_p$  values from NIST for CaO and for CaCO<sub>3</sub> from (Gary K. Jacobs, Derrill M. Kerrick, and Kenneth M. Krupka, The High-Temperature Heat Capacity of Natural Calcite (CaCO<sub>3</sub>), Phys Chem Minerals (1981) 7:55 59).

Actually, since  $\Delta c_p$  is negative the enthalpy of reaction decreases with temperature as shown in the following Table.

Standard enthalpy of reaction at different temperatures, for the reaction CaCO<sub>3</sub> -> CaO + CO<sub>2</sub>

| t in °C | $\Delta H_{R,T}^{\circ}$ (kJ/ mol) |
|---------|------------------------------------|
| 25      | 178.5                              |
| 100     | 178.1                              |
| 300     | 176.3                              |
| 400     | 174.9                              |
| 500     | 173.3                              |
| 650     | 170.3                              |
| 800     | 167.2                              |
| 850     | 166.1                              |
| 860     | 165.9                              |
| 869     | 165.7                              |
| 890     | 165.3                              |
| 920     | 164.6                              |

## References

- 1) A. Khosa and C. Y. Zhao, *Solar Energy*, 2019, 188, 619-630.
- 2) H. Sun, Y. Li, X. Yan, Z. Wang and W. Liu, *Energy Conversion and Management*, 2020, 222, 113222.
- 3) K. T. Møller, T. D. Humphries, A. Berger, M. Paskevicius and C. E. Buckley, *Chemical Engineering Journal Advances*, 2021, 8, 100168.
- 4) Antzara, E. Heracleous and A. A. Lemonidou, *Applied Energy*, 2015, 156, 331-343.
- 5) K. T. Møller, A. Berger, M. Paskevicius and C. E. Buckley, *Journal of Alloys and Compounds*, 2022, 891, 161954.
- 6) M. Benitez-Guerrero, J. M. Valverde, P. E. Sanchez-Jimenez, A. Perejon and L. A. Perez-Maqueda, *Chemical Engineering Journal*, 2018, 334, 2343-2355.
- 7) Y. Zhou, Z. Zhou, L. Liu, X. She, R. Xu, J. Sun and M. Xu, *Energy & Fuels*, 2021, 35, 18778-18788.
- 8) K. T. Møller, A. Ibrahim, C. E. Buckley and M. Paskevicius, *Journal of Materials Chemistry A*, 2020, 8, 9646-9653.
- 9) X. Chen, X. Jin, Z. Liu, X. Ling and Y. Wang, *Energy*, 2018, 155, 128-138.
- 10) T. Richardson, R. K. Vijayaraghavan, P. McNally and M. V. Sofianos, Available at SSRN 4156637.
